# Supplementary material
Source: PubMed Central journal article supplement (PMC4363408)
Supplement: IAI.03135-14_zii999091150so1.pdf [file IAI.03135-14_zii999091150so1.pdf]

**Supplemental Table 1. Primers used in the qRT-PCR analyses.**

| Gene                   | ZFIN ID              | Human gene ortholog (HGNC)    | Sequence 5'-3'                                            | Reference             |
|------------------------|----------------------|-------------------------------|-----------------------------------------------------------|-----------------------|
| <i>furinA</i>          | ZDB-GENE-040901-1    | <i>FURIN</i>                  | F CCAAAGAGGCTTTCCAACGC<br>R CGTACTGCTGCTGATGGACAG         | -                     |
| <i>pcsk1</i>           | ZDB-GENE-071009-1    | <i>PCSK1</i>                  | F CGGAAAAGGAGTGGTCAT<br>R GGTGGAGTCGTATCTGGG              | Turpeinen et al. 2013 |
| <i>pcsk2</i>           | ZDB-GENE-090608-1    | <i>PCSK2</i>                  | F CGGATCTGTATGGAACTGC<br>R GCCGGACTGTATTTTATGAAT          | Turpeinen et al. 2013 |
| <i>furinB</i>          | ZDB-GENE-040901-2    | <i>FURIN</i>                  | F CCAAGGCATCTACATCAACAC<br>R ACACCTCTGTGCTGGAAA           | Turpeinen et al. 2013 |
| <i>pcsk5a</i>          | ZDB-GENE-060531-130  | <i>PCSK5</i>                  | F GGAGTTTCAATGACCCCAA<br>R ACCACAACCTTTCCCA               | Turpeinen et al. 2013 |
| <i>pcsk5b</i>          | ZDB-GENE-070822-7    | <i>PCSK5</i>                  | F TGTTCTCGACCCTTACCAC<br>R ATCTCGCCATGTCAGGAAA            | Turpeinen et al. 2013 |
| <i>pcsk7</i>           | ZDB-GENE-030131-7293 | <i>PCSK7</i>                  | F AGAGTGTGGACGGG<br>R TGCCTAATGGATGCGGT                   | Turpeinen et al. 2013 |
| <i>cd247 (cd3zeta)</i> | ZDB-GENE-061130-4    | <i>CD247</i>                  | F CATCACC GGCTTCTTTGTGC<br>R CCCAGTTTATCAATGGCCTGA        | Hammarén et al. 2014  |
| <i>tbx21 (T-bet)</i>   | ZDB-GENE-080104-3    | <i>TBX21</i>                  | F GGCCTACCAGAATGCAGACA<br>R GGTCCGTACAGCGTGCATA           | Hammarén et al. 2014  |
| <i>gata3</i>           | ZDB-GENE-990415-82   | <i>GATA3</i>                  | F GGATGGCACC GGTC ACTATT<br>R CAGCAGACAGCCTCCGTTT         | Hammarén et al. 2014  |
| <i>foxp3a</i>          | ZDB-GENE-061116-2    | <i>FOXP3</i>                  | F CAAAAGCAGAGTGCCAGTGG<br>R CGCATAAGCACC GATTCTGC         | Hammarén et al. 2014  |
| <i>rorca</i>           | ZDB-GENE-990415-250  | <i>RORC</i>                   | F GAAGGCTGCAAGGGCTTCTT<br>R TGCAGTTCCTCTGCCTTGAG          | -                     |
| <i>tnfa</i>            | ZDB-GENE-050317-1    | <i>TNF</i>                    | F GGGCAATCAAC AAGATGGAAG<br>R GCAGCTGATGTGCAAGACAC        | Parikka et al. 2012   |
| <i>il1b</i>            | ZDB-GENE-040702-2    | <i>IL1B</i>                   | F TGGACTTCGCAGCACAAAATG<br>R GTTCACTTCACGCTTTGGATG        | Parikka et al. 2012   |
| <i>lta</i>             | ZDB-GENE-050601-3    | <i>LTA</i>                    | F CCACAGTTCAGCAGGACCTC<br>R TTTCTGCGTGCTCTCATGTC          | -                     |
| <i>ifng1-1</i>         | ZDB-GENE-060210-1    | <i>IFNG</i>                   | F AAATGGTGCTACTCTGTGGAC<br>R TTCCAACCCAATCCTTTG           | Oksanen et al. 2013   |
| <i>il22 (ifnphi6)</i>  | ZDB-GENE-060209-3    | <i>IL22</i>                   | F TCAGACGAGCACACAGATATG<br>R GATGGCTGGAGTAGTCGTG          | -                     |
| <i>il17a/f3</i>        | ZDB-GENE-041001-192  | <i>IL17A</i> and <i>IL17F</i> | F GGCTCTCACGGGTTTTCAG<br>R ACACTTCTTCACACCAGAACATC        | -                     |
| <i>il10</i>            | ZDB-GENE-051111-1    | <i>IL10</i>                   | F GCTCTGCTCACGCTTCTTC<br>R TGGTTCCAAGTCATCGTTG            | -                     |
| <i>tgfb1a</i>          | ZDB-GENE-030618-1    | <i>TGFB1</i>                  | F TCGTCTTCCAGCAAGCTCAG<br>R TTGGAGACAAAGCGAGTTCC          | -                     |
| <i>eef1a111 (ef1a)</i> | ZDB-GENE-990415-52   | <i>EEF1A1</i>                 | F CTGGAGGCCAGCTCAAACAT<br>R ATCAAGAAGAGTAGTACCGCTAGCATTAC | Tang et al. 2007      |
| <i>mmts</i>            | -                    | -                             | F CACCACGAGAAACTCCAA<br>R ACATCCCGAAACCAACAGAG            | Parikka et al. 2012   |

Zebrafish gene names and qRT-PCR primer sequences are listed accompanied with the ZFIN identification codes and the names of the orthologous genes in humans. HGNC, HUGO Gene Nomenclature Committee.

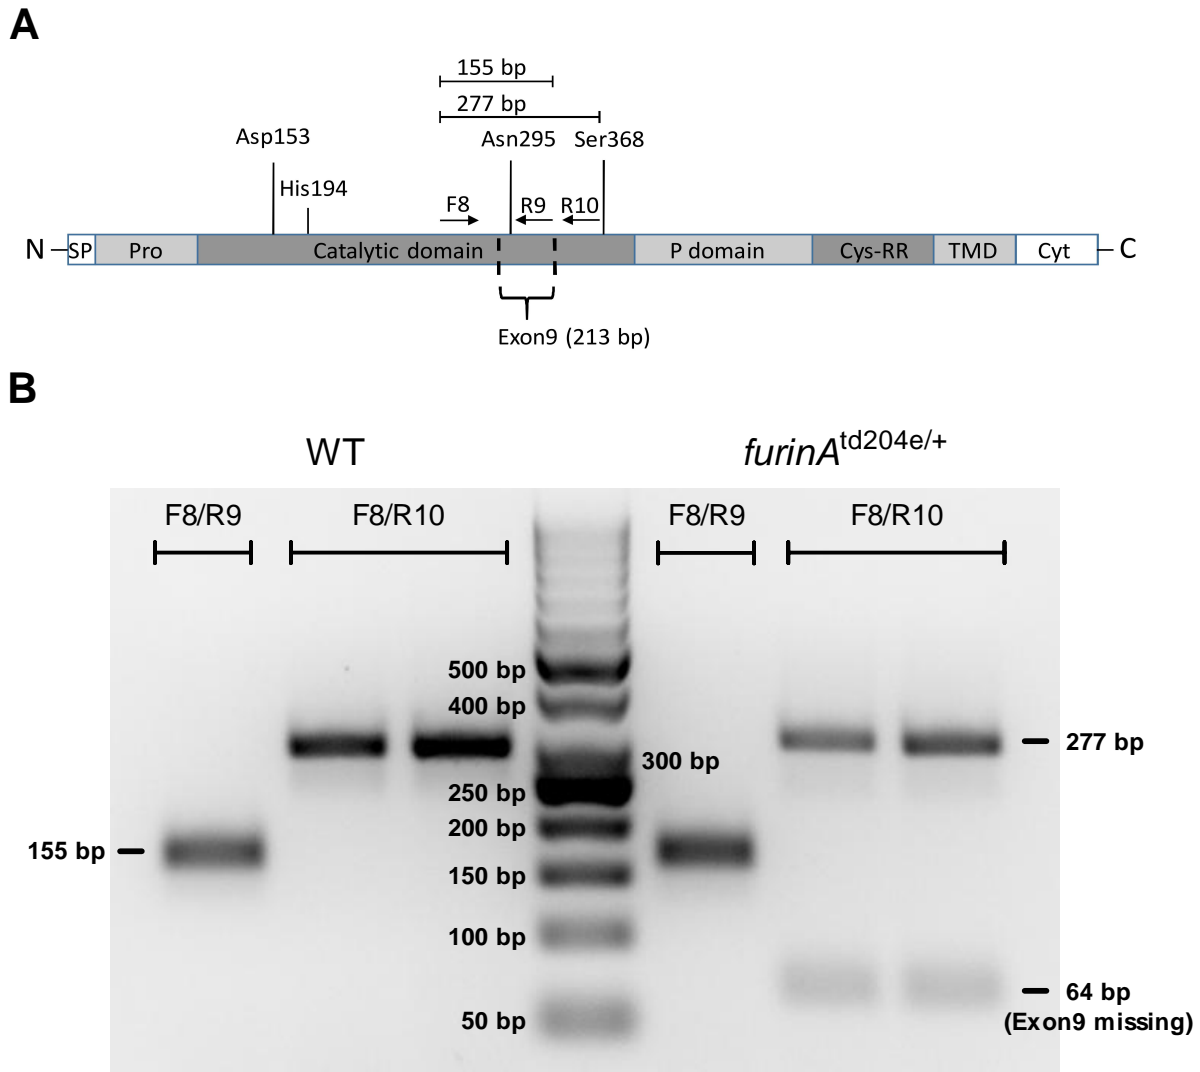

**Supplemental Figure 1. *furina*<sup>td204e</sup> mutation disrupts the transcription of exon 9.**

(A) A schematic presentation of the FURIN/FurinA domain structure and the catalytic amino acid residues (Asp153, His194, Asn295 and Ser 368), as well as the location of exon 9. (B) cDNA from both WT and *furina*<sup>td204e/+</sup> mutant zebrafish was used as a template in a standard PCR reaction with different primer pairs (F8=Forward primer in exon 8, R9=Reverse primer in exon 9, R10=Reverse primer in exon 10). PCR products were analyzed with agarose gel electrophoresis, which demonstrates the presence of a 64 bp band only in reactions containing cDNA from *furina*<sup>td204e/+</sup> mutants. The bands were excised and further verified by DNA sequencing (Data not shown).

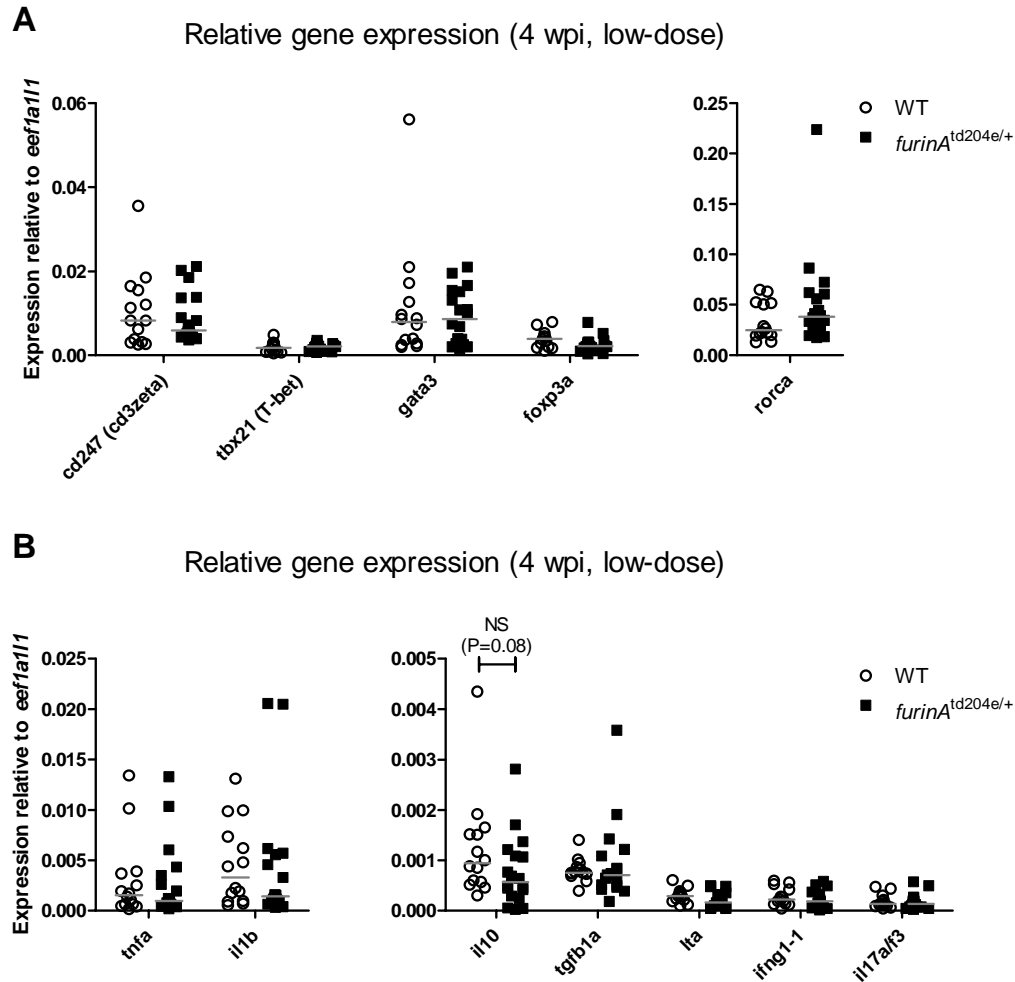

**Supplemental Figure 2. Comparison of the T cell marker gene expression and the innate cytokine response in *furinA*<sup>td204e/+</sup> mutants and WT controls in an experimental low-dose mycobacterial infection at 4 wpi.**

A latent mycobacterial infection was induced with a low-dose *M. marinum* inoculate. Relative expression of (A) Th cell marker genes (*cd247*, *tbx21*, *gata3*, *foxp3a*, *rorca*) as well as (B) pro-inflammatory cytokine genes (*tnfa*, *il1b*, *lta*, *ifng1-1*, *il17a/f3*) and anti-inflammatory cytokine genes (*il10*, *tgfb1a*) was determined in *furinA*<sup>td204e/+</sup> (n=13-14) and WT (n=16-18) zebrafish with qRT-PCR at 4 wpi. Gene expressions were normalized to *eef1a1/1* expression and represented as a scatter dot plot and median. A two-tailed Mann-Whitney was used in the statistical comparison of differences.

Relative gene expression (9 wpi, low-dose)

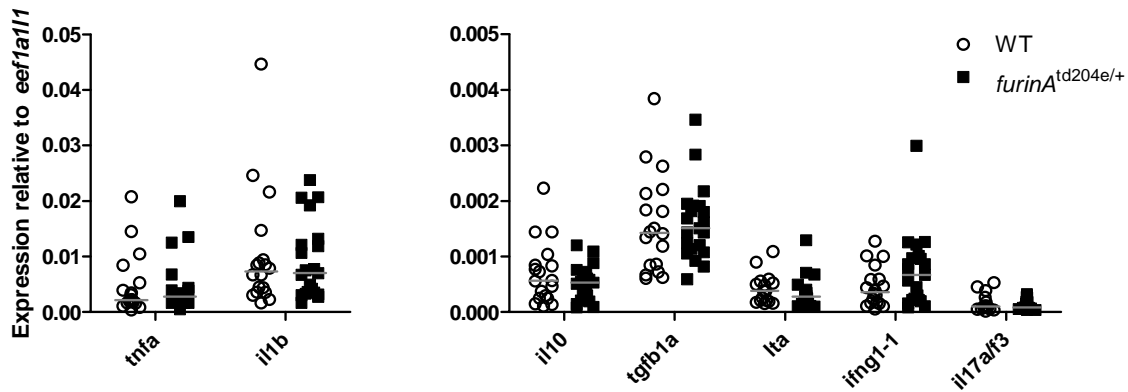

**Supplemental Figure 3. Comparison of the innate cytokine response in *furinA*<sup>td204e/+</sup> mutants and WT controls in an experimental low-dose mycobacterial infection at 9 wpi.**

A latent mycobacterial infection was induced with a low-dose *M. marinum* inoculate. Relative expression of pro-inflammatory cytokine genes (*tnfa*, *il1b*, *lta*, *ifng1-1*, *il17a/f3*) and anti-inflammatory cytokine genes (*il10*, *tgfb1a*) was determined in *furinA*<sup>td204e/+</sup> (n=18-21) and WT (n=16-18) zebrafish with qRT-PCR at 9 wpi. Gene expressions were normalized to *eef1a111* expression and represented as a scatter dot plot and median. A two-tailed Mann-Whitney was used in the statistical comparison of differences.
